# Supplementary material for: HIV-1 Vpr N-terminal tagging affects alternative splicing of the viral genome
Source: PubMed Central journal article supplement (PMC5056386; doi:10.1038/srep34573), 2016-10-10
Supplement: srep34573-s1.pdf [file srep34573-s1.pdf]

1 **HIV-1 Vpr N-terminal tagging affects alternative splicing of the viral genome**

2 **Ann Baeyens<sup>1</sup>, Evelien Naessens<sup>1</sup>, Anouk Van Nuffel<sup>1</sup>, Karin E Weening<sup>1</sup>, Anne-Marie**

3 **Reilly<sup>1</sup>, Eva Claeys<sup>1</sup>, Wim Trypsteen<sup>2</sup>, Linos Vandekerckhove<sup>2</sup>, Sven Eyckerman<sup>3,4</sup>,**

4 **Kris Gevaert<sup>3,4</sup>, Bruno Verhasselt<sup>1,\*</sup>**

5

6 **Supplementary information**

7

## 8 **Supplement 1. Molecular cloning pLZRS and pNL4-3 constructs**

9

### 10 Retroviral vector pLZRS cloning

11 The NL4-3 Vpr sequence <sup>[1]</sup> was amplified by PCR (Platinum® Pfx DNA polymerase,  
12 Thermo Fisher Scientific, Waltham, MA) as instructed by the supplier with primers FWD C  
13 and REV N or with tailed primers FWD N (containing N-terminal tags) or REV C (containing  
14 C-terminal tags); together with primers REV N or FWD C, respectively (primer sequences  
15 enclosed in Supplement 7). Cloned PCR products were verified by sequencing and transferred  
16 to the retroviral vector pLZRS <sup>[2]</sup> using restriction sites BamHI and XhoI, as were added by  
17 FWD C/N and REV C/N primers. Vpr proteins are expressed from a bicistronic mRNA  
18 (thanks to the IRES sequence), also encoding dNGFR as a separate marker protein to identify  
19 construct expressing cells.

20

### 21 pNL4-3 HIV-1 HA/FLAG-Vpr cloning

22 The pNL4-3-HSA-IRES-Nef WT plasmid (kindly provided by Dr. M.J. Tremblay, Faculté de  
23 Médecine, Université Laval, Québec, Canada) <sup>[3]</sup> was used as a parental vector for cloning.  
24 This plasmid encodes a replication competent HIV-1 virus, modified in the nef reading frame  
25 to express nef-IRES-HSA, thus both Nef and the marker protein HSA, what allows to identify  
26 infected cells by flow cytometry. The N-terminal region of Vpr was subcloned as a 440 bp  
27 PflMI-EcoRI-fragment containing a fragment of both Vif and Vpr. To this fragment tags were  
28 added using tailed primers. Two PCR products were created using primer combinations  
29 FWD1/REV1 and FWD N/REV 2. Primer FWD N incorporates the HA/FLAG tags, which  
30 are preceded by Met-Glu (ME) and are separated by Gln (Q) linkers. These products were  
31 combined in a third PCR reaction, using 50 ng of each purified PCR product and outlying  
32 primers FWD 1 and REV 2. The PCR program consisted of an initial denaturation of 2

33 minutes (min) at 94°C, next 10 cycles of amplification without primers: 30 seconds (s) at  
 34 94°C, 1 min at 57°C and 1 min at 68°C, followed by 30 cycles of amplification with primers  
 35 and a final elongation step of 4 min at 68°C. The PCR product was sequenced and then cloned  
 36 back to pNL4-3 to replace the untagged Vpr. Primer sequences can be found in Supplement 7.

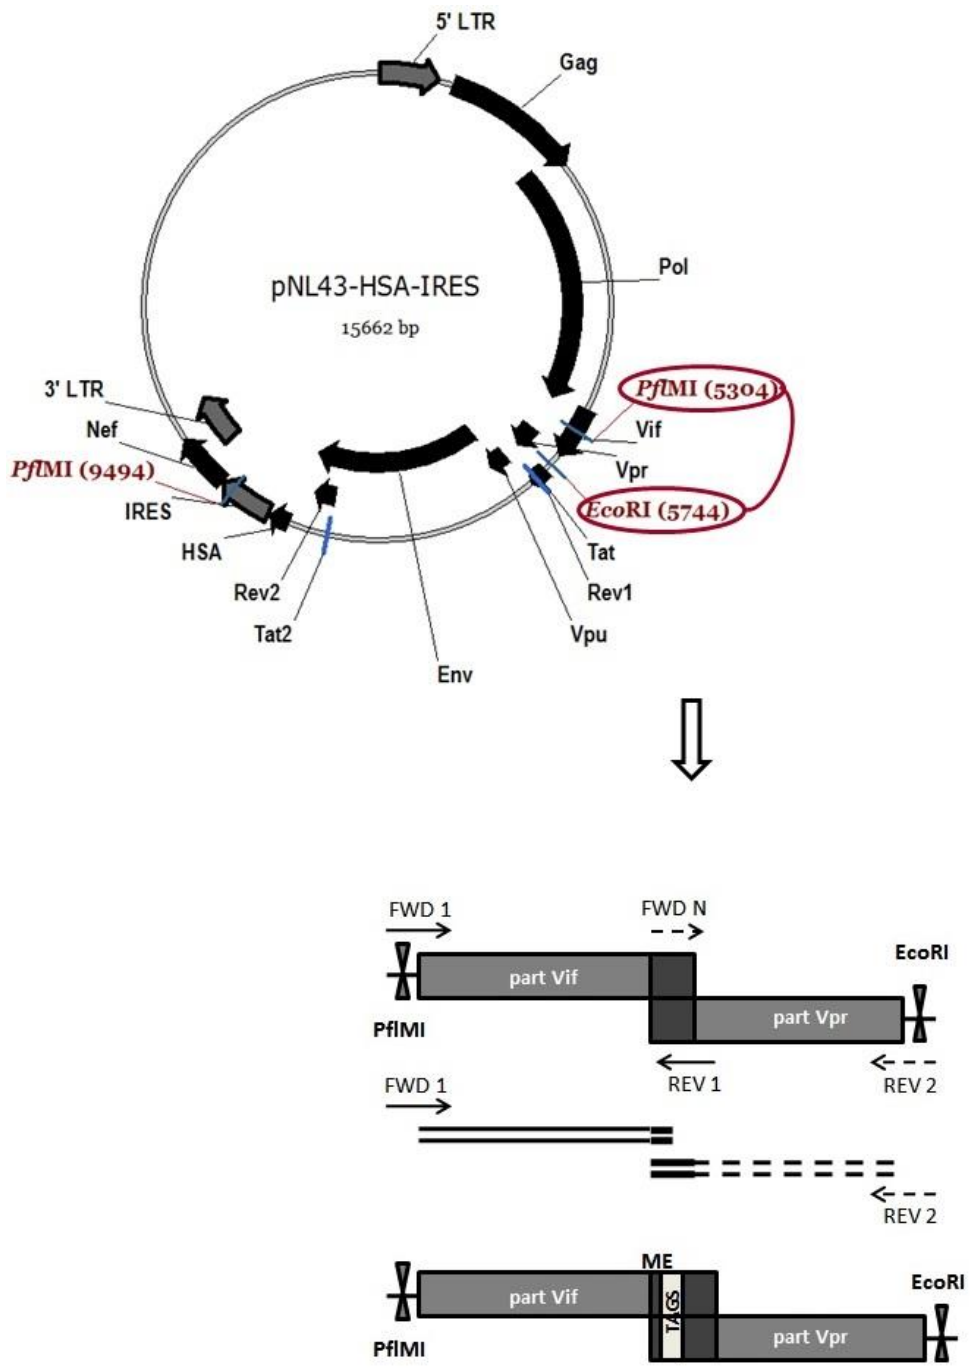

37

38

39

40 pNL4-3 HIV-1 VPR<sup>ins20</sup>, VPR<sup>ins21</sup> and VPR<sup>scr</sup> cloning

41 The VPR mutants were created by PCR and restriction as was described for the HA/FLAG-  
 42 Vpr mutant, and using the same PflMI-EcoRI subfragment as template as well as the same  
 43 protocol for PCR. However, primer annealing temperatures (Ta) were adjusted depending on  
 44 the primers used. Primer combinations and Ta are described in the table below. Primer  
 45 sequences can be found in Supplement 7.

| mutant               | PCR step 1+2 | Ta   | primers                    | PCR step 3 | Ta   | primers   |
|----------------------|--------------|------|----------------------------|------------|------|-----------|
| VPR <sup>ins20</sup> | PCR 1        | 57°C | FWD 1                      | Nested PCR | 55°C | FWD 1     |
|                      |              |      | VPR <sup>ins20</sup> REV 1 |            |      |           |
|                      | PCR 2        | 55°C | VPR <sup>ins20</sup> FWD 2 |            |      | VPR REV 2 |
|                      |              |      | VPR REV 2                  |            |      |           |
| VPR <sup>ins21</sup> | PCR 1        | 57°C | FWD 1                      | Nested PCR | 55°C | FWD 1     |
|                      |              |      | VPR <sup>ins21</sup> REV 1 |            |      |           |
|                      | PCR 2        | 55°C | VPR <sup>ins21</sup> FWD 2 |            |      | VPR REV 2 |
|                      |              |      | VPR REV 2                  |            |      |           |
| VPR <sup>scr</sup>   | PCR 1        | 57°C | FWD 1                      | Nested PCR | 55°C | FWD 1     |
|                      |              |      | VPR <sup>scr</sup> REV 1   |            |      |           |
|                      | PCR 2        | 55°C | VPR <sup>scr</sup> FWD 2   |            |      | VPR REV 2 |
|                      |              |      | VPR REV 2                  |            |      |           |

46

47 pNL4-3 HIV-1 HA/His<sub>6</sub>-Vpr cloning

48 The pNL4-3 HA/His<sub>6</sub>-Vpr cloning was started from a synthesized dsDNA gene fragment  
 49 (gBlocks®, IDT), encoding the NL4-3 PflMI-EcoRI fragment with HA and His<sub>6</sub> tags. The  
 50 sequence of the gBlocks® was verified and is enclosed in Supplement 7. This gene fragment  
 51 was cloned in pNL4-3 as described for pNL4-3 HA/FLAG-Vpr cloning.

52 **Supplement 2. HIV-1 HA/FLAG-Vpr replication in CEM-GFP.**

53 Cells were infected with 40 ng (p24) WT HIV or 100  $\mu$ l HA/FLAG-Vpr HIV (corresponding  
54 to 4-6 ng (p24)), as done for SupT1 (compare to Fig. 2E). Infection is quantified by GFP  
55 expression on different days (D1 to D16 as indicated) post-infection, as response to LTR  
56 transcriptional activity. Flow cytometry dot plots (GFP versus side scatter) from a  
57 representative experiment are shown (left). Figures in dot plots indicate percentage of GFP  
58 positive cells (in rectangular gate). These data (mean  $\pm$  SEM of 2 experiments) is plotted over  
59 time (right).

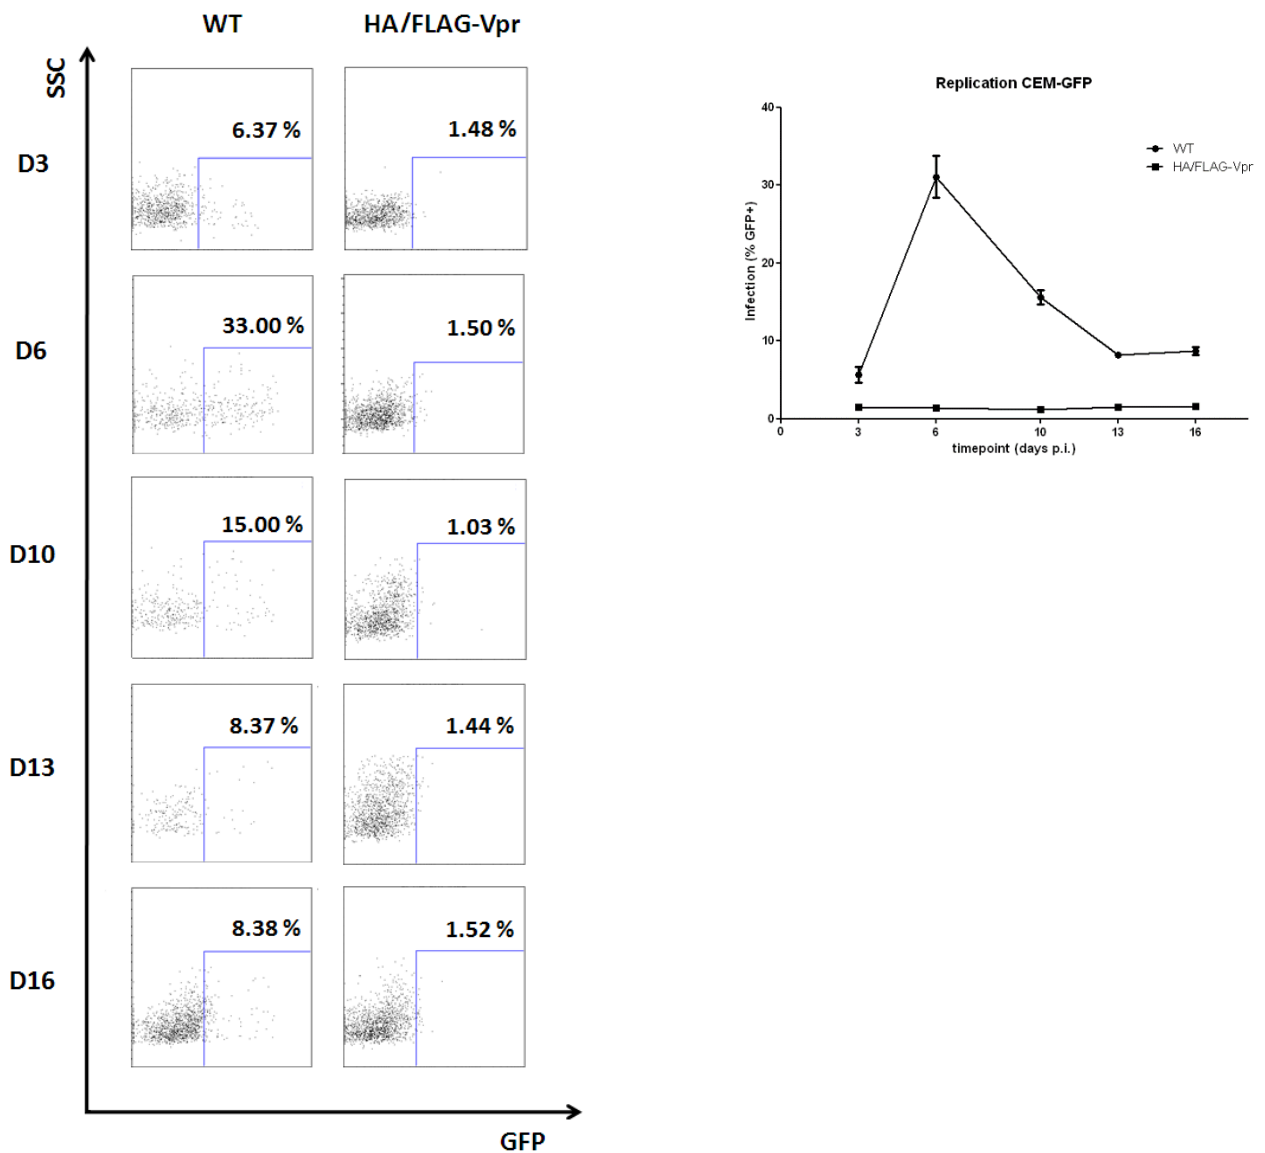

60

61

62

63

64

65

66

67

68

69 **Supplement 3. Reverse Transcriptase (RT) activity of 293T-produced virus.** 48 h post-  
70 transfection, viral supernatants was harvested and quantified for RT activity. Left panel: WT  
71 virus with HSA reporter, NL4-3 HA/FLAG-Vpr (also with HSA reporter or WT backbone)  
72 N=1. Right panel: NL4-3 WT and NL4-3 HA/His<sub>6</sub>-Vpr (both HSA backbone, mean values  $\pm$   
73 SEM). N=5, Mann-Whitney U test, p=0.6905.

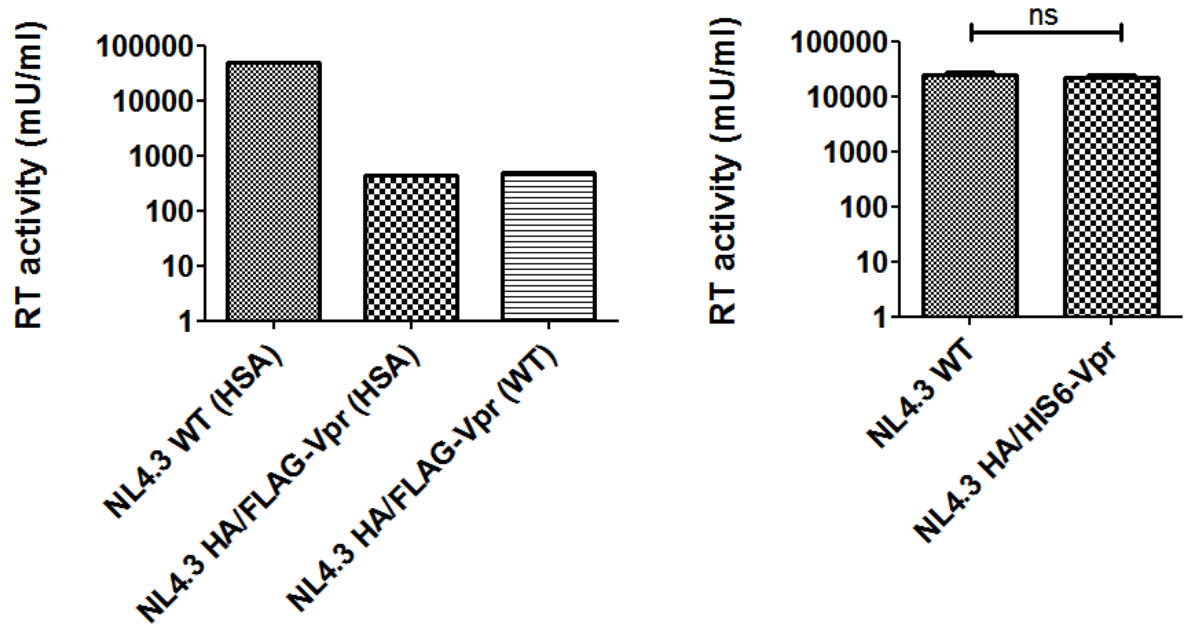

74

75

76 **Supplement 4. VPR mutants Reverse Transcriptase (RT) activity and infectivity.**

77 Viral supernatant was produced as described in Material and Methods and the average RT  
78 activity  $\pm$  SEM of 3 experiments was plotted (upper panel). SupT1 cells were infected with 20  
79 ng (p24) of virus and infection was assessed on day 1, 2, 4 and 7 (lower panels). For infection  
80 and replication, the average of 9 samples  $\pm$  SEM is plotted.

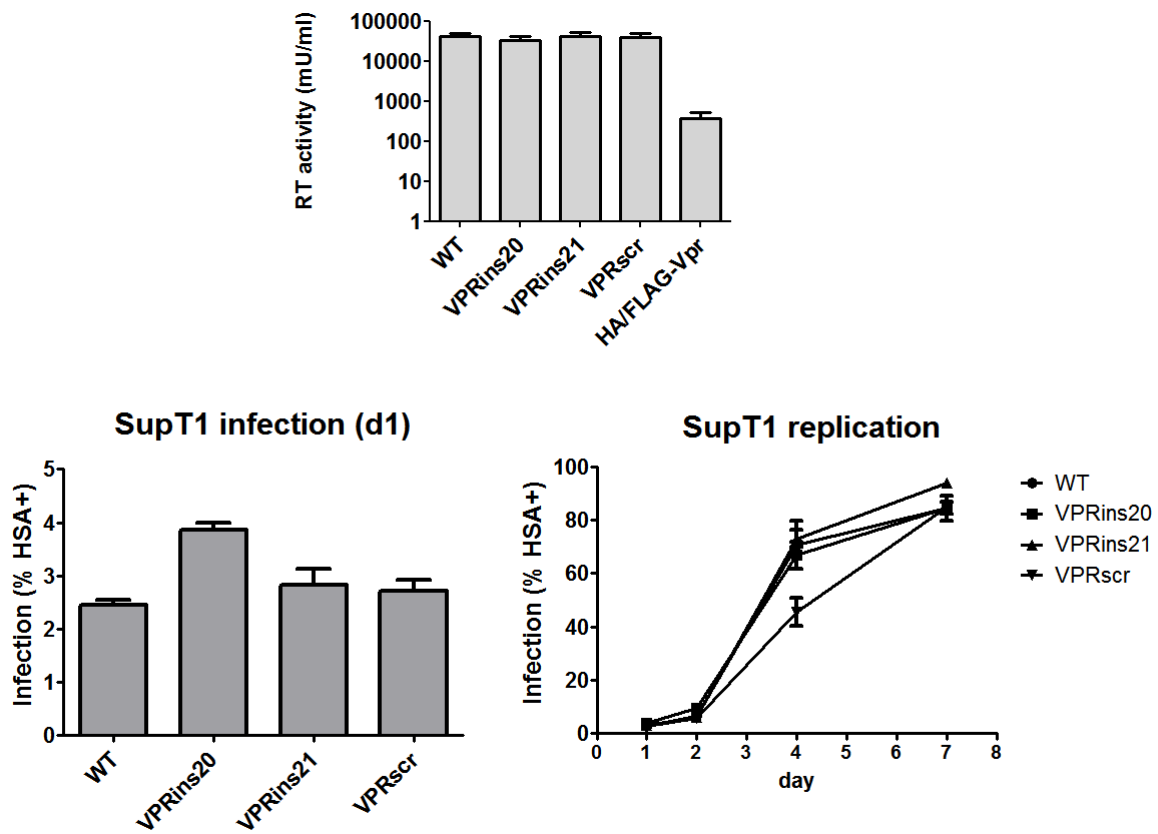

81

82



83 **Supplement 5. VPR mutants splicing assay.**

84 Splicing was assessed on RNA, isolated from transfected 293T cells, as described. Graph  
 85 shows expression of unspliced (US), singly spliced (SS) and multiple spliced (MS) mRNA  
 86 relative to average expression levels from all mutants and normalized for reference gene  
 87 expression.

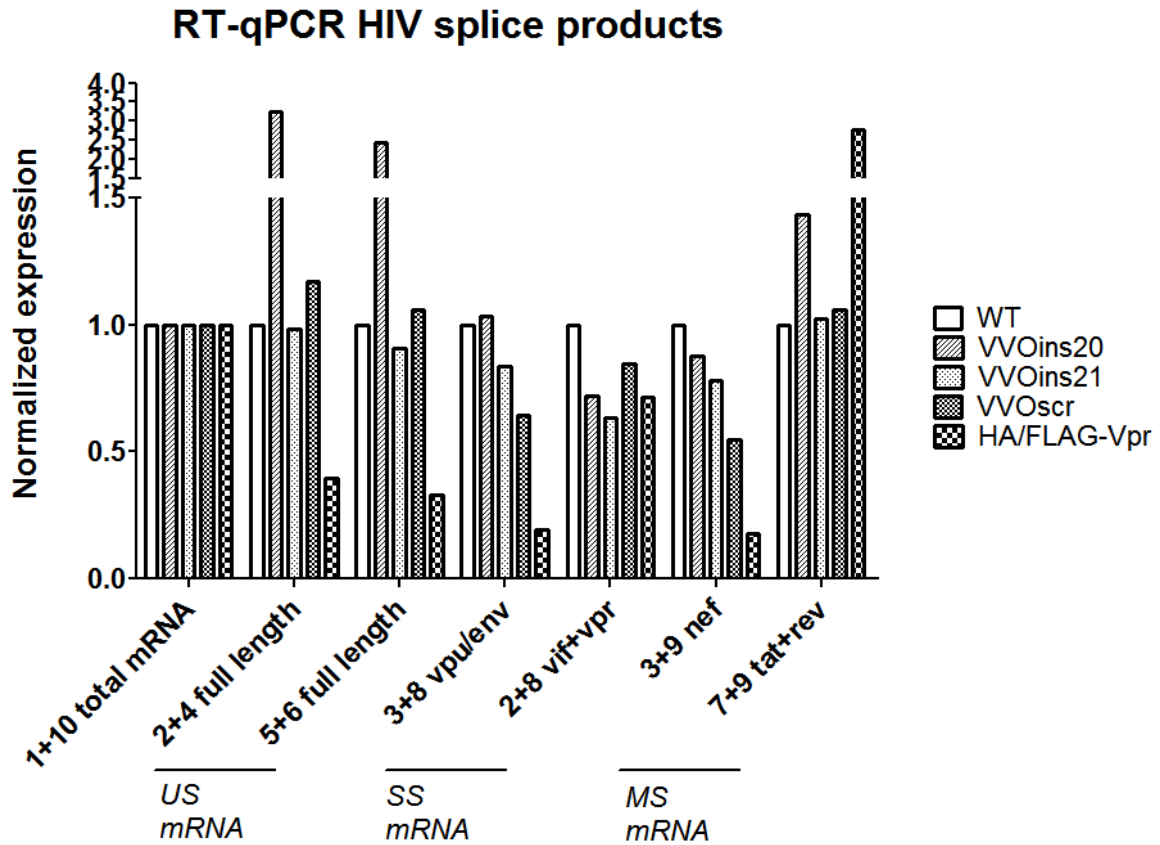

88

89 **Supplement 6. HIV-1 HA/His<sub>6</sub>-Vpr infection in SupT1.** Infection measured 4 days post-  
90 infection by HSA-IRES-Nef marker expression from NL4-3 backbone, either WT (untagged  
91 Vpr) or HA/His<sub>6</sub>-Vpr. Plot shows mean  $\pm$  SEM, N=9, Mann-Whitney U test, p=0.0003.

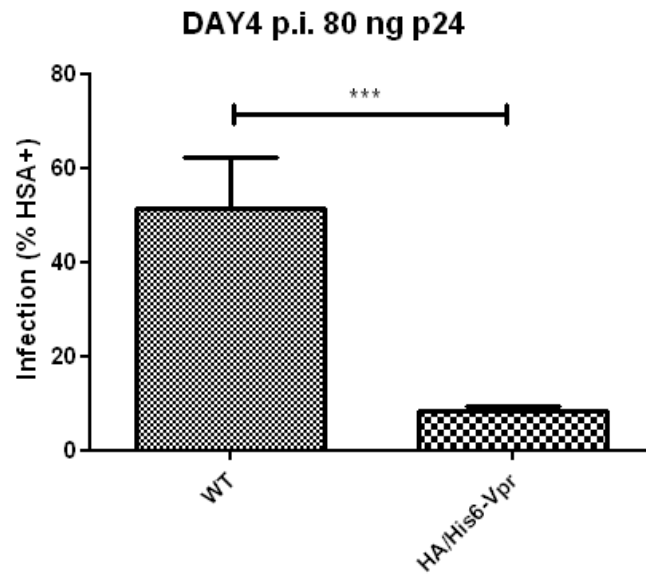

92

93

94 **Supplement 7. Primers and gene fragment.** Table with primers used for cloning and HIV  
 95 splicing qPCR. Primer p1-p9 were adopted from Houzet and colleagues <sup>[4]</sup>; primer p10 and  
 96 primers for reference genes were developed in-house. Primer p10 was developed to still bind  
 97 the 3' LTR like the original p10 primer presented in <sup>[4]</sup>. The gBlocks® fragment (IDT) was  
 98 used as a gene fragment for cloning, substituting PCR steps. The tag sequences used to  
 99 encode HA, FLAG or His<sub>6</sub> are highlighted in bold.

| pLZRS Vpr N/C TAP cloning                                     |                                                                                                                      |
|---------------------------------------------------------------|----------------------------------------------------------------------------------------------------------------------|
| primer                                                        | sequence                                                                                                             |
| FWD N<br>(HA/FLAG)                                            | 5'-<br>AAGGATCCATGGAATACCCCTACGACGTCCCCGACTACGCCCA<br>GGACTACAAGGACGACGACGACAAGCAGGAACAAGCCCCAGA<br>AGACCAA-3'       |
| REV N                                                         | 5'-TTCTCGAGTTGGCGGCCAGTCTAGGATCTACTGGCTCC-3'                                                                         |
| FWD C                                                         | 5'-AAGGATCCCAGATGGAACAAGCCCCAGAAGACCC-3'                                                                             |
| REV C<br>(HA/FLAG)                                            | 5'-<br>TTCTCGAGCTAGGCCGTAGTCGGGGACGTCGTAGGGGTATTGCT<br>TGTCGTCGTCGTCCTTGTAGTCTTGGGATCTACTGGCTCCATTTC<br>TTG-3'       |
| pNL4.3 HA/FLAG-Vpr cloning                                    |                                                                                                                      |
| primer                                                        | sequence                                                                                                             |
| FWD 1                                                         | 5'-GGGTCAGGGAGTCTCCATAGAATGG-3'                                                                                      |
| REV 1                                                         | 5'-TCGTAGGGGTATTCCATCTGTCCTCTG-3'                                                                                    |
| REV 2                                                         | 5'-ATAAACAGCAGTTGTTGCAGAATTC-3'                                                                                      |
| pNL4.3 VVO <sup>ins20/21</sup> and VVO <sup>scr</sup> cloning |                                                                                                                      |
| primer                                                        | sequence                                                                                                             |
| VPR <sup>ins20</sup> REV 1                                    | 5'-TCGGGGACGTCGTAGGGGTA-3'                                                                                           |
| VPR <sup>ins21</sup> REV 1                                    | 5'-GTCGGGGACGTCGTAGGGGTA-3'                                                                                          |
| VPR <sup>ins20</sup> FWD 2                                    | 5'-TACCCCTACGACGTCCCCGACAAGCCCCAGAAGACCAAGG-3'                                                                       |
| VPR <sup>ins21</sup> FWD 2                                    | 5'-TACCCCTACGACGTCCCCGACCAAGCCCCAGAAGACCAAGG-3'                                                                      |
| VPR REV 2                                                     | 5'-GAATTCTGCAACAACCTGCTGTTTAT-3'                                                                                     |
| VPR <sup>scr</sup> REV 1                                      | 5'-<br>TCTAAAAGCTCTATCCGATGCGTTGACCGACAGCATGCAGTACCT<br>GGGCGATTTCGGATAATGACAGCACATCTGTCCTCTGTCAGTTTCCT<br>AACACT-3' |
| VPR <sup>scr</sup> FWD 2                                      | 5'-CATCGGATAGAGCTTTTAGAGGAACTTAAGAGTGA-3'                                                                            |

100

| HIV splicing qPCR                                                  |                                                                                                                                                                                                                                                                                                                                                                                                                                                                                                                                                                                    |
|--------------------------------------------------------------------|------------------------------------------------------------------------------------------------------------------------------------------------------------------------------------------------------------------------------------------------------------------------------------------------------------------------------------------------------------------------------------------------------------------------------------------------------------------------------------------------------------------------------------------------------------------------------------|
| primer                                                             | sequence                                                                                                                                                                                                                                                                                                                                                                                                                                                                                                                                                                           |
| p1                                                                 | 5'-GATTGGCAGAACTACACACCAGGGC-3'                                                                                                                                                                                                                                                                                                                                                                                                                                                                                                                                                    |
| p2                                                                 | 5'-GTGGAAAATCTCTAGCAGTGGCGC-3'                                                                                                                                                                                                                                                                                                                                                                                                                                                                                                                                                     |
| p3                                                                 | 5'-GAGGGGCGGCGACTGGAAGAA-3'                                                                                                                                                                                                                                                                                                                                                                                                                                                                                                                                                        |
| p4                                                                 | 5'-TCTTTCCCCCTGGCCTTAACCG-3'                                                                                                                                                                                                                                                                                                                                                                                                                                                                                                                                                       |
| p5                                                                 | 5'-TCAGCATTATCAGAAGGAGCCACC-3'                                                                                                                                                                                                                                                                                                                                                                                                                                                                                                                                                     |
| p6                                                                 | 5'-TCATCCATCCTATTTGTTCTGAAG-3'                                                                                                                                                                                                                                                                                                                                                                                                                                                                                                                                                     |
| p7                                                                 | 5'-GAAGAAGCGGAGACAGCGACGAAG-3'                                                                                                                                                                                                                                                                                                                                                                                                                                                                                                                                                     |
| p8                                                                 | 5'-ACTATGGACCACACAACCTATTGC-3'                                                                                                                                                                                                                                                                                                                                                                                                                                                                                                                                                     |
| p9                                                                 | 5'-CAAGCGGTGGTAGCTGAAGAG-3'                                                                                                                                                                                                                                                                                                                                                                                                                                                                                                                                                        |
| p10                                                                | 5'-GCGGCTGTCAAACCTCCACTC-3'                                                                                                                                                                                                                                                                                                                                                                                                                                                                                                                                                        |
| UBC FWD                                                            | 5'-ATTTGGGTTCGCGTTCTTG-3'                                                                                                                                                                                                                                                                                                                                                                                                                                                                                                                                                          |
| UBC REV                                                            | 5'-TGCCTTGACATTCTCGATGGT-3'                                                                                                                                                                                                                                                                                                                                                                                                                                                                                                                                                        |
| TBP FWD                                                            | 5'-CACGAACCACGGCACTGATT-3'                                                                                                                                                                                                                                                                                                                                                                                                                                                                                                                                                         |
| TBP REV                                                            | 5'-TTTTCTTGCTGCCAGTCTGGAC-3'                                                                                                                                                                                                                                                                                                                                                                                                                                                                                                                                                       |
| YWHAZ FWD                                                          | 5'-ACTTTTGGTACATTGTGGCTTCAA-3'                                                                                                                                                                                                                                                                                                                                                                                                                                                                                                                                                     |
| YWHAZ REV                                                          | 5'-CCGCCAGGACAAACCAGTAT-3'                                                                                                                                                                                                                                                                                                                                                                                                                                                                                                                                                         |
| pNL4.3 HA/His <sub>6</sub> -Vpr cloning                            |                                                                                                                                                                                                                                                                                                                                                                                                                                                                                                                                                                                    |
| gBlocks <sup>®</sup>                                               | sequence                                                                                                                                                                                                                                                                                                                                                                                                                                                                                                                                                                           |
| NL4.3 HA/His <sub>6</sub> -Vpr gBlocks <sup>®</sup><br>PflMI-EcoRI | 5'-<br>AAACCATAGAATGGAGGAAAAAGAGATATAGCACACAAGTAGAC<br>CCCGACCTAACAGACCAACTAATTCATCTGCACTATTTTGATTGTT<br>TTTCAGAATCTGCTATAAGAAATACCATATTAGGACGTATAGTTA<br>GTCCTAGGTGTGAATATCAAGCAGGACATAACAAGGTAGGATCTC<br>TACAGTACTTGGCACTAGCAGCATTAATAAAAACCAAAACAGATA<br>AAGCCACCTTTGCCTAGTGTTAGGAAACTGACAGAGGACAGATGG<br>AATACCCCTACGACGTCCCCGACTACGCCCAGCATCATCACC<br>ATCACCACCAGCAAGCCCCAGAAGACCAAGGGCCACAGAGGGA<br>GCCATACAATGAATGGACACTAGAGCTTTTAGAGGAACTTAAGAG<br>TGAAGCTGTTAGACATTTTCCTAGGATATGGCTCCATAACTTAGGA<br>CAACATATCTATGAACTTACGGGGATACTTGGGCAGGAGTGGAA<br>GCCATAATAAGAATTCAA-3' |

| HIV splicing qPCR                                                  |                                                                                                                                                                                                                                                                                                                                                                                                                                                                                                                                                                                                    |
|--------------------------------------------------------------------|----------------------------------------------------------------------------------------------------------------------------------------------------------------------------------------------------------------------------------------------------------------------------------------------------------------------------------------------------------------------------------------------------------------------------------------------------------------------------------------------------------------------------------------------------------------------------------------------------|
| primer                                                             | sequence                                                                                                                                                                                                                                                                                                                                                                                                                                                                                                                                                                                           |
| p1                                                                 | 5'-GATTGGCAGA ACTACACACCAGGGC-3'                                                                                                                                                                                                                                                                                                                                                                                                                                                                                                                                                                   |
| p2                                                                 | 5'-GTGGAAAATCTCTAGCAGTGGCGC-3'                                                                                                                                                                                                                                                                                                                                                                                                                                                                                                                                                                     |
| p3                                                                 | 5'-GAGGGGCGGGCGACTGGAAGAA-3'                                                                                                                                                                                                                                                                                                                                                                                                                                                                                                                                                                       |
| p4                                                                 | 5'-TCTTTCCCCCTGGCCTTAACCG-3'                                                                                                                                                                                                                                                                                                                                                                                                                                                                                                                                                                       |
| p5                                                                 | 5'-TCAGCATTATCAGAAGGAGCCACC-3'                                                                                                                                                                                                                                                                                                                                                                                                                                                                                                                                                                     |
| p6                                                                 | 5'-TCATCCATCCTATTTGTTCTGAAG-3'                                                                                                                                                                                                                                                                                                                                                                                                                                                                                                                                                                     |
| p7                                                                 | 5'-GAAGAAGCGGAGACAGCGACGAAG-3'                                                                                                                                                                                                                                                                                                                                                                                                                                                                                                                                                                     |
| p8                                                                 | 5'-ACTATGGACCACACA ACTATTGC-3'                                                                                                                                                                                                                                                                                                                                                                                                                                                                                                                                                                     |
| p9                                                                 | 5'-CAAGCGGTGGTAGCTGAAGAG-3'                                                                                                                                                                                                                                                                                                                                                                                                                                                                                                                                                                        |
| p10                                                                | 5'-GCGGCTGTCAAACCTCCACTC-3'                                                                                                                                                                                                                                                                                                                                                                                                                                                                                                                                                                        |
| UBC FWD                                                            | 5'-ATTTGGGTCGCGGTTCTTG-3'                                                                                                                                                                                                                                                                                                                                                                                                                                                                                                                                                                          |
| UBC REV                                                            | 5'-TGCCTTGACATTCTCGATGGT-3'                                                                                                                                                                                                                                                                                                                                                                                                                                                                                                                                                                        |
| TBP FWD                                                            | 5'-CACGAACCACGGCACTGATT-3'                                                                                                                                                                                                                                                                                                                                                                                                                                                                                                                                                                         |
| TBP REV                                                            | 5'-TTTTCTTGCTGCCAGTCTGGAC-3'                                                                                                                                                                                                                                                                                                                                                                                                                                                                                                                                                                       |
| YWHAZ FWD                                                          | 5'-ACTTTTGGTACATTGTGGCTTCAA-3'                                                                                                                                                                                                                                                                                                                                                                                                                                                                                                                                                                     |
| YWHAZ REV                                                          | 5'-CCGCCAGGACAAACCAGTAT-3'                                                                                                                                                                                                                                                                                                                                                                                                                                                                                                                                                                         |
| pNL4.3 HA/His <sub>6</sub> -Vpr cloning                            |                                                                                                                                                                                                                                                                                                                                                                                                                                                                                                                                                                                                    |
| gBlocks <sup>®</sup>                                               | sequence                                                                                                                                                                                                                                                                                                                                                                                                                                                                                                                                                                                           |
| NL4.3 HA/His <sub>6</sub> -Vpr gBlocks <sup>®</sup><br>PflMI-EcoRI | 5'-<br>AAACCATAGAATGGAGGAAAAAGAGATATAGCA<br>CACAAGTAGACCCCGACCTAACAGACCAACTAA<br>TTCATCTGCACTATTTTGATTGTTTTTCAGAATCTG<br>CTATAAGAAATACCATATTAGGACGTATAGTTAG<br>TCCTAGGTGTGAATATCAAGCAGGACATAACAAG<br>GTAGGATCTCTACAGTACTTGGCACTAGCAGCAT<br>TAATAAAAACCAAAACAGATAAAGCCACCTTTGC<br>CTAGTGTTAGGAACTGACAGAGGACAGATGGA<br>ATACCCCTACGACGTCCCCGACTACGCCAGC<br>ATCATCACCATCACCACCAGCAAGCCCCAGAAG<br>ACCAAGGGCCACAGAGGGAGCCATAACAATGAAT<br>GGACACTAGAGCTTTTAGAGGAACTTAAGAGTGA<br>AGCTGTTAGACATTTTCTAGGATATGGCTCCATA<br>ACTTAGGACAACATATCTATGAAACTTACGGGGA<br>TACTTGGGCAGGAGTGGAAGCCATAATAAGAATT<br>CAAA-3' |

102

103

104

105 **References**

106 1. Adachi, A., et al. Production of acquired immunodeficiency syndrome-associated  
107 retrovirus in human and nonhuman cells transfected with an infectious molecular clone. *J*  
108 *Viol.* **59**, 284-291 (1986).

109 2. Landi, A., et al. Genome-wide shRNA screening identifies host factors involved in  
110 early endocytic events for HIV-1-induced CD4 down-regulation. *Retrovirol.* **11**, doi:  
111 10.1186/s12977-12014-10118-12974. (2014).

112 3. Imbeault, M., Lodge, R., Ouellet, M., Tremblay, M.J. Efficient magnetic bead-based  
113 separation of HIV-1-infected cells using an improved reporter virus system reveals that p53  
114 up-regulation occurs exclusively in the virus-expressing cell population. *Viol.* **393**, 160-167  
115 (2009).

116 4. Houzet, L., et al. HIV controls the selective packaging of genomic, spliced viral and  
117 cellular RNAs into virions through different mechanisms. *Nucleic Acids Res.* **35**, 2695-2704  
118 (2007).

119

120
